# Supplementary material for: Cobalt–citrate framework armored with graphene oxide exhibiting improved thermal stability and selectivity for biogas decarburization
Source: Royal Society of Chemistry journal article supplement (doi:10.1039/c4ta04770b), 2014-11-03
Supplement: c4ta04770b1.pdf [file c4ta04770b1.pdf]

## Supplementary Information

### Armored Cobalt-Citrate Framework with Graphene Oxide Exhibiting Improved Thermal Stability and Selectivity for Biogas Decarburization

Yangcan Shen,<sup>1,2</sup> Ziyin Li,<sup>1</sup> Lihua Wang,<sup>1</sup> Yingxiang Ye,<sup>1</sup> Qing Liu,<sup>1</sup> Xiuling Ma,<sup>1</sup> Qianhou Chen,<sup>1</sup>  
Zhangjing Zhang<sup>1,\*</sup> and Shengchang Xiang<sup>1,3,\*</sup>

<sup>1</sup> Fujian Provincial Key Laboratory of Polymer Materials, College of Material Sciences and Engineering, Fujian Normal University, 32 Shangsan Road, Fuzhou 350007, China

<sup>2</sup> State Key Laboratory of Structural Chemistry, Fujian Institute of Research on the Structure of Matter, Chinese Academy of Sciences, Fuzhou, Fujian 350002, PR China

<sup>3</sup> College of Life and Environmental Sciences, Minzu University of China, 27 South Zhongguancun Boulevard, Haidian District, Beijing 100081, China

\* To whom correspondence should be addressed.

Email addresses: Z.-J. Zhang ([zzhang@fjnu.edu.cn](mailto:zzhang@fjnu.edu.cn)) and S.-C. Xiang ([scxiang@fjnu.edu.cn](mailto:scxiang@fjnu.edu.cn))

## Contents

|                                                                                                                                                                                                     |     |
|-----------------------------------------------------------------------------------------------------------------------------------------------------------------------------------------------------|-----|
| Table S1   Summary of the parameters and the enthalpies of gas adsorption on UTSA-16-GO composites at 296 and 273 K obtained from the virial equation.....                                          | S3  |
| Table S2   Adsorption selectivities for equimolar CO <sub>2</sub> /CH <sub>4</sub> mixture at 200 kPa and 296 K by IAST on different MOFs .....                                                     | S4  |
| Figure S1   FTIR spectra of as-synthesized GO, UTSA-16 and composites.....                                                                                                                          | S5  |
| Figure S2   SEM images for the composites.....                                                                                                                                                      | S6  |
| Figure S3   TEM images for UTSA-16.....                                                                                                                                                             | S6  |
| Figure S4   TEM images for the composites.....                                                                                                                                                      | S6  |
| Figure S5   (a) Cumulative pore volume and (b) pore-size distribution for UTSA-16 and its composites.....                                                                                           | S7  |
| Figure S6   The virial graphs for adsorption of CO <sub>2</sub> on UTSA-16-GO9.5.....                                                                                                               | S8  |
| Figure S7   The virial graphs for adsorption of CH <sub>4</sub> on UTSA-16-GO9.5.....                                                                                                               | S8  |
| Figure S8   The virial graphs for adsorption of CO <sub>2</sub> on UTSA-16-GO19.....                                                                                                                | S8  |
| Figure S9   The virial graphs for adsorption of CH <sub>4</sub> on UTSA-16-GO19.....                                                                                                                | S9  |
| Figure S10   The virial graphs for adsorption of CO <sub>2</sub> on UTSA-16-GO28.5.....                                                                                                             | S9  |
| Figure S11   The virial graphs for adsorption of CH <sub>4</sub> on UTSA-16-GO28.5.....                                                                                                             | S9  |
| Figure S12   Comparison of the enthalpies for gas adsorption of CO <sub>2</sub> , CH <sub>4</sub> on UTSA-16-GO9.5 from two methods: virial equation (solid) and linear extrapolation (open) .....  | S10 |
| Figure S13   Comparison of the enthalpies for gas adsorption of CO <sub>2</sub> , CH <sub>4</sub> on UTSA-16-GO19 from two methods: virial equation (solid) and linear extrapolation (open) .....   | S10 |
| Figure S14   Comparison of the enthalpies for gas adsorption of CO <sub>2</sub> , CH <sub>4</sub> on UTSA-16-GO28.5 from two methods: virial equation (solid) and linear extrapolation (open) ..... | S10 |
| Figure S15   The graphs of the Single-site Langmuir-Freundlich equations fit for adsorption of CO <sub>2</sub> (left) and CH <sub>4</sub> (right) on UTSA-16-GO9.5 at 296K.....                     | S11 |
| Figure S16   The graphs of the Single-site Langmuir-Freundlich equations fit for adsorption of CO <sub>2</sub> (left) and CH <sub>4</sub> (right) on UTSA-16-GO19 at 296K.....                      | S11 |
| Figure S17   The graphs of the Single-site Langmuir-Freundlich equations fit for adsorption of CO <sub>2</sub> (left) and CH <sub>4</sub> (right) on UTSA-16-GO28.5 at 296K.....                    | S11 |
| Supplementary References.....                                                                                                                                                                       | S12 |

Table S1 | Summary of the parameters and the enthalpies of gas adsorption on UTSA-16-GO composites at 296 and 273 K obtained from the virial equation, as shown in Figures S6~S11.

| Sample         | adsorbate       | T/<br>K | $A_0/ln(mol g^{-1} Pa^{-1})$ | $A_1/g mol^{-1}$ | $R^2$ | $\Delta H/kJ mol^{-1}$ |
|----------------|-----------------|---------|------------------------------|------------------|-------|------------------------|
| UTSA-16-GO9.5  | CO <sub>2</sub> | 296     | -12.780±0.112                | -1684.456±27.666 | 0.998 | 36.1                   |
|                |                 | 273     | -11.544±0.141                | -2002.903±41.121 | 0.998 |                        |
|                | CH <sub>4</sub> | 296     | -19.471±0.001                | -420.455±4.349   | 0.999 | 10.9                   |
|                |                 | 273     | -19.097±0.001                | -324.566±12.874  | 0.994 |                        |
| UTSA-16-GO19   | CO <sub>2</sub> | 296     | -12.059±0.092                | -1405.067±29.558 | 0.996 | 42.1                   |
|                |                 | 273     | -10.616±0.119                | -1653.615±37.188 | 0.998 |                        |
|                | CH <sub>4</sub> | 296     | -19.038±0.002                | -296.732±7.023   | 0.996 | 11.7                   |
|                |                 | 273     | -18.646±3.946E-4             | -251.911±1.888   | 0.999 |                        |
| UTSA-16-GO28.5 | CO <sub>2</sub> | 296     | -12.021±0.075                | -1943.720±56.301 | 0.994 | 40.0                   |
|                |                 | 273     | -10.650±0.113                | -2285.230±70.018 | 0.996 |                        |
|                | CH <sub>4</sub> | 296     | -19.176±6.443E-4             | -407.189±8.954   | 0.996 | 11.4                   |
|                |                 | 273     | -18.800±0.002                | -402.117±11.438  | 0.996 |                        |

Table S2 | Adsorption selectivities for equimolar CO<sub>2</sub>/CH<sub>4</sub> mixture at 200 kPa and 296 K by IAST on different MOFs.

| MOFs                                                                   | T / K | $S_{ads}$ (CO <sub>2</sub> /CH <sub>4</sub> ) | Supplementary References |
|------------------------------------------------------------------------|-------|-----------------------------------------------|--------------------------|
| polyamine incorporated amine-MIL-101 (Cr) (c)                          | 298   | 931                                           | 1                        |
| polyamine incorporated amine-MIL-101 (Cr) (b)                          | 298   | 278                                           | 1                        |
| UTSA-16-GO19                                                           | 296   | 114.4                                         | This work                |
| MgMOF-74                                                               | 296   | 105                                           | 2                        |
| UTSA-16-GO9.5                                                          | 296   | 98.7                                          | This work                |
| UTSA-16-GO28.5                                                         | 296   | 89.4                                          | This work                |
| [Cd <sub>2</sub> L1(H <sub>2</sub> O)] <sub>2</sub> ·5H <sub>2</sub> O | 298   | 66                                            | 3                        |
| UTSA-16                                                                | 296   | 29.8                                          | 2                        |
| polyamine incorporated amine-MIL-101 (Cr) (a)                          | 298   | 21                                            | 1                        |
| Fe <sub>2</sub> (dobdc)                                                | 298   | 20.2                                          | 4                        |
| UiO-66(Zr)-CO <sub>2</sub> H                                           | 298   | 19.2                                          | 5                        |
| MOF-5 (IRMOF-1)                                                        | 298   | 15.5                                          | 6                        |
| UTSA-15a                                                               | 296   | 14.2                                          | 2                        |
| Cu-TDPAT                                                               | 296   | 13.8                                          | 2                        |
| bio-MOF-11                                                             | 298   | ~12                                           | 7                        |
| Cu(bpy-1) <sub>2</sub> (SiF <sub>6</sub> )                             | 298   | ~11                                           | 8                        |
| Zn <sub>5</sub> (BTA) <sub>6</sub> (TDA) <sub>2</sub>                  | 296   | 10.8                                          | 2                        |
| ZIF-78                                                                 | 296   | 10.4                                          | 2                        |
| MIL-101                                                                | 296   | 9.6                                           | 9                        |
| UTSA-72a                                                               | 293   | 9.6                                           | 10                       |
| UTSA-25a                                                               | 296   | 9.4                                           | 2                        |
| UTSA-20a                                                               | 296   | 8.3                                           | 2                        |
| Fe <sub>2</sub> (O <sub>2</sub> )(dobdc)                               | 298   | 7.8                                           | 4                        |
| CuBTC                                                                  | 296   | 7.4                                           | 9                        |
| UTSA-33a                                                               | 296   | 7.0                                           | 2                        |
| MIL-53                                                                 | 298   | 7                                             | 11                       |
| UTSA-34b                                                               | 296   | 5.1                                           | 2                        |
| MOF-177                                                                | 298   | 4.4                                           | 6                        |

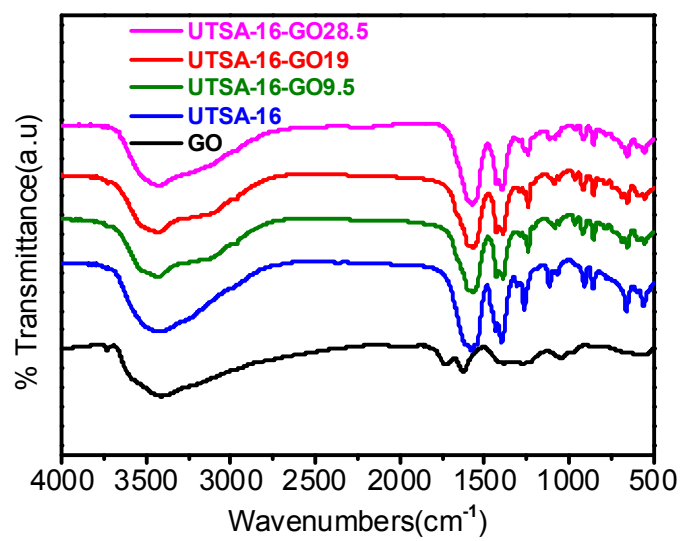

Figure S1 | FTIR spectra of as-synthesized GO, UTSA-16 and composites.

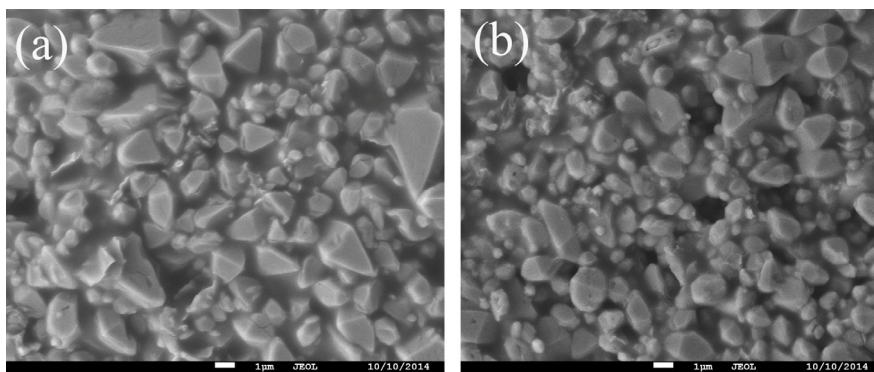

Figure S2 | SEM images for UTSA-16-GO9.5 (a) and UTSA-16-GO28.5 (b).

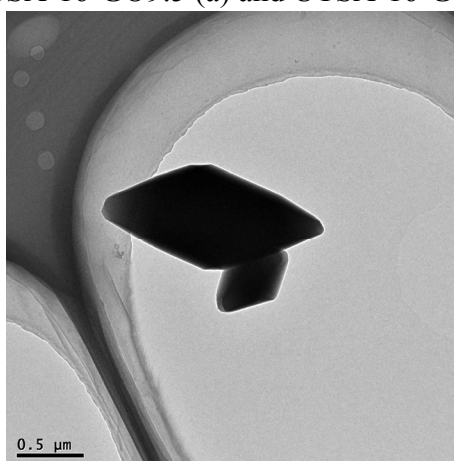

Figure S3 | TEM images for UTSA-16.

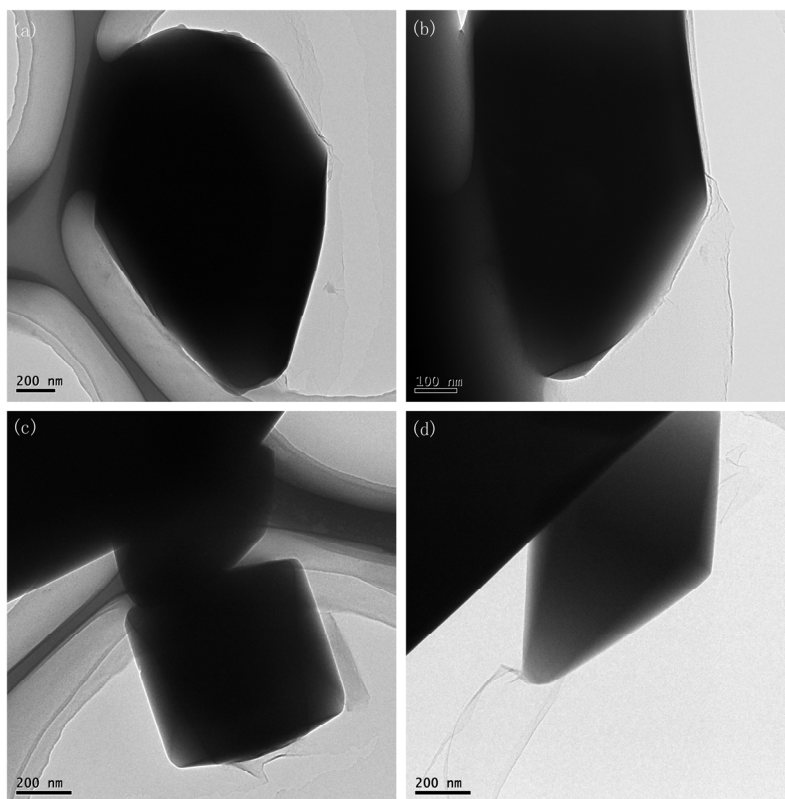

Figure S4 | TEM images for UTSA-16-GO9.5 (a, b), UTSA-16-GO28.5 (c, d).

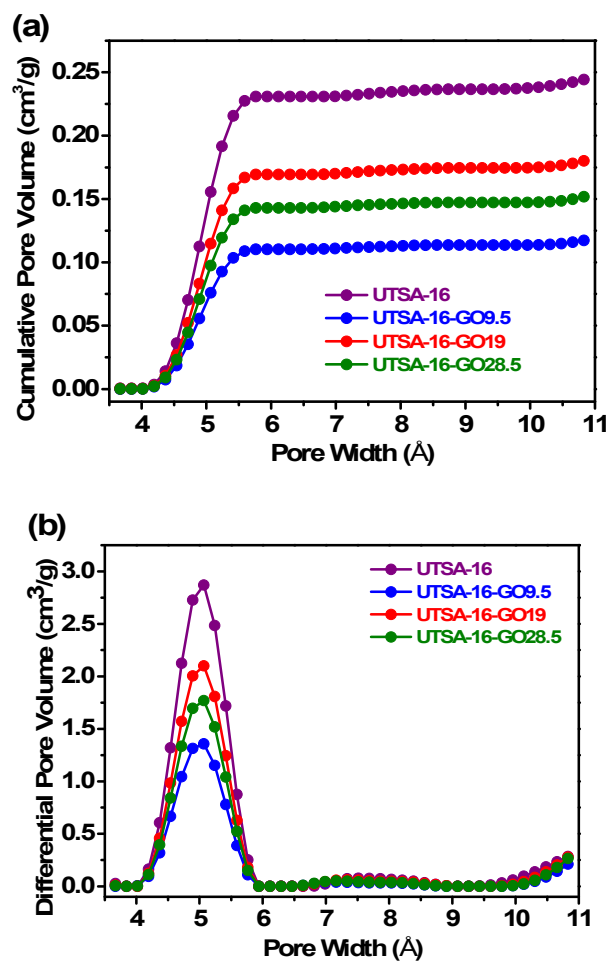

Figure S5 | (a) Cumulative pore volume and (b) pore-size distribution for UTSA-16 and its composites from CO<sub>2</sub> adsorption at 273 K (calculated by using a slit pore NLDFT model).

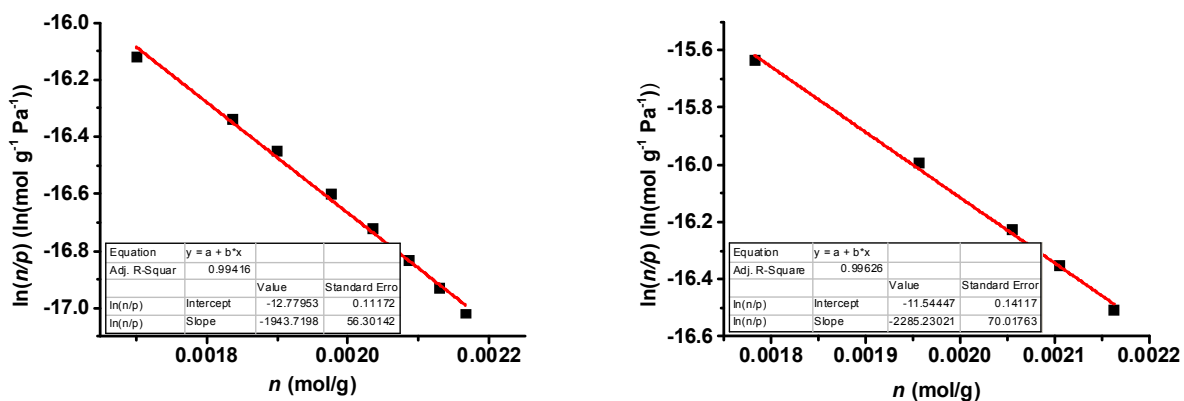

Figure S6 | The virial graphs for adsorption of CO<sub>2</sub> on UTSA-16-GO9.5 at 296 K (left) and 273 K (right).

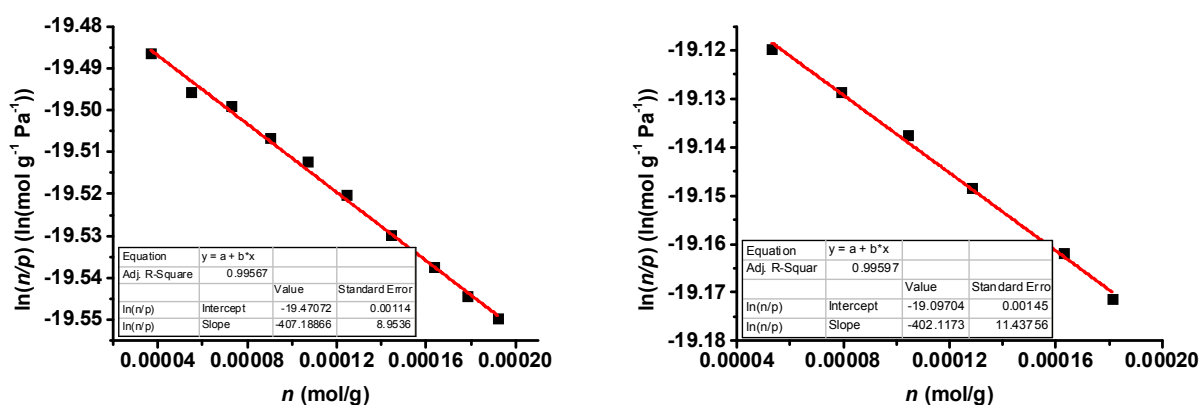

Figure S7 | The virial graphs for adsorption of CH<sub>4</sub> on UTSA-16-GO9.5 at 296 K (left) and 273 K (right).

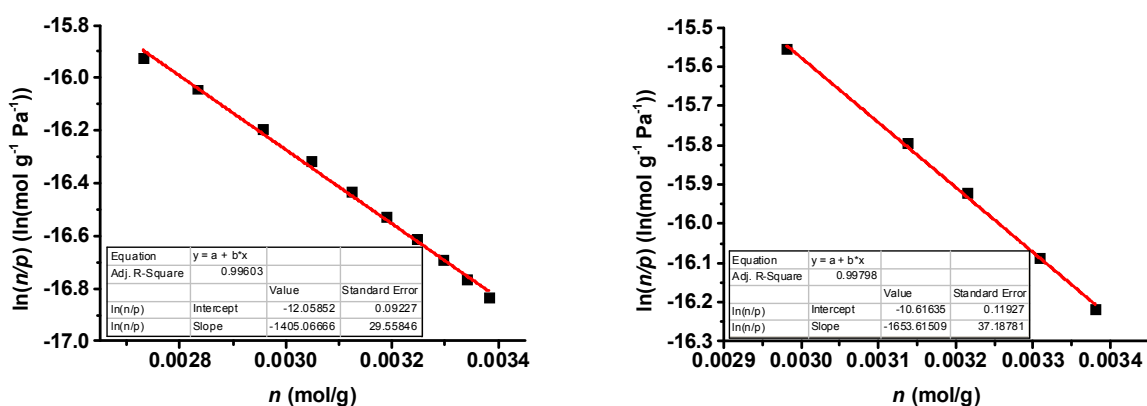

Figure S8 | The virial graphs for adsorption of CO<sub>2</sub> on UTSA-16-GO19 at 296 K (left) and 273 K (right).



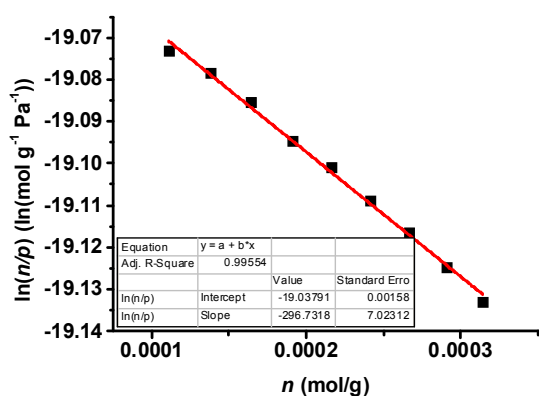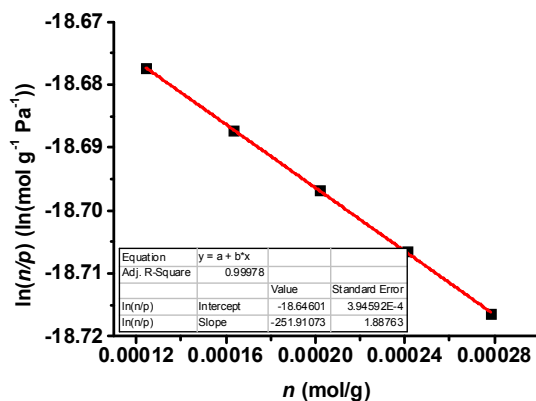

Figure S9 | The virial graphs for adsorption of CH<sub>4</sub> on UTSA-16-GO19 at 296 K (left) and 273 K (right).

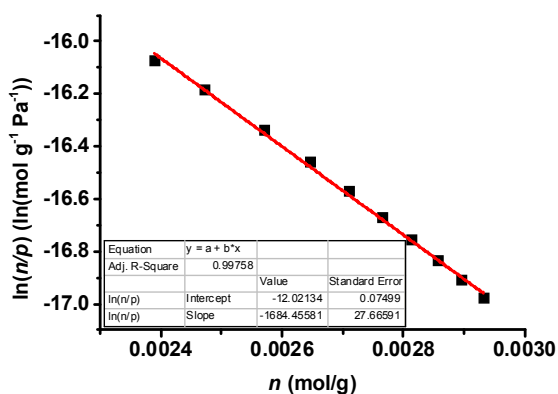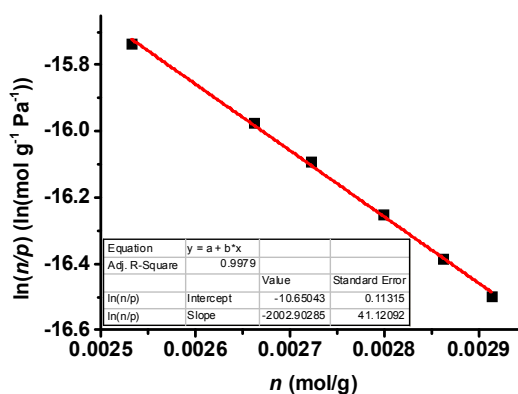

Figure S10 | The virial graphs for adsorption of CO<sub>2</sub> on UTSA-16-GO28.5 at 296 K (left) and 273 K (right).

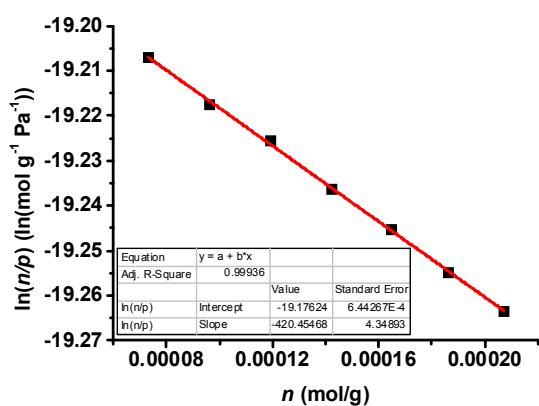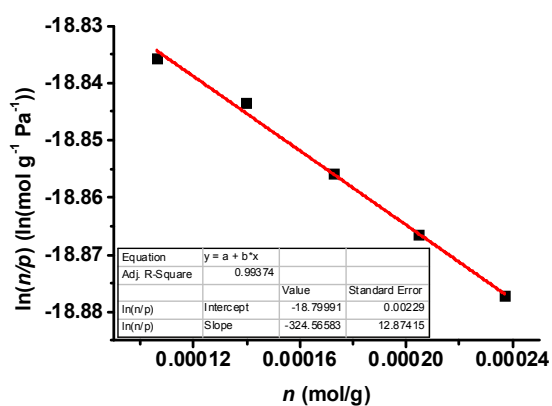

Figure S11 | The virial graphs for adsorption of CH<sub>4</sub> on UTSA-16-GO28.5 at 296 K (left) and 273 K (right).

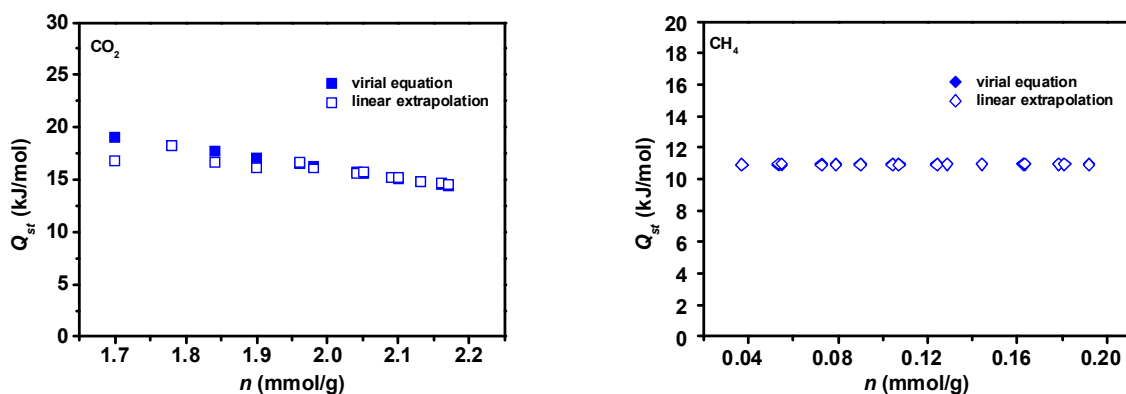

Figure S12 | Comparison of the enthalpies for gas adsorption of CO<sub>2</sub> (left), CH<sub>4</sub> (right) on UTSA-16-GO9.5 from two methods: virial equation (solid) and linear extrapolation (open).

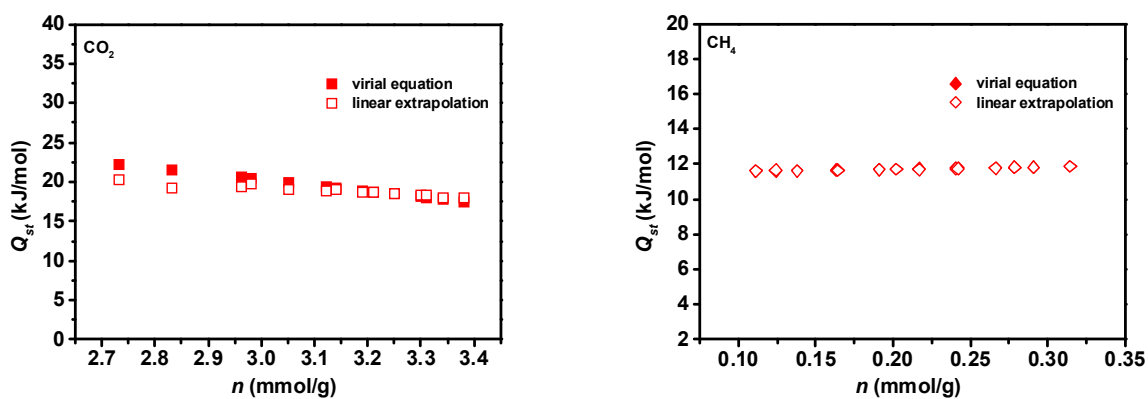

Figure S13 | Comparison of the enthalpies for gas adsorption of CO<sub>2</sub> (left), CH<sub>4</sub> (right) on UTSA-16-GO19 (magenta) from two methods: virial equation (solid) and linear extrapolation (open).

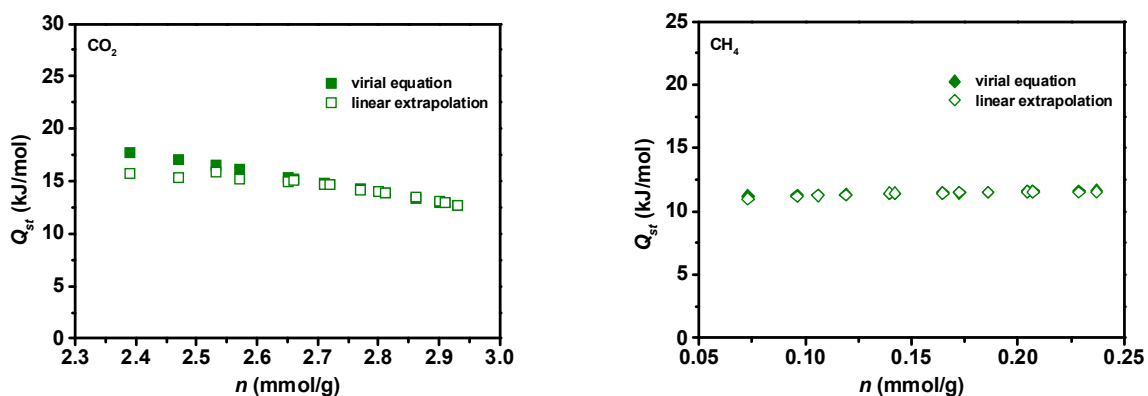

Figure S14 | Comparison of the enthalpies for gas adsorption of CO<sub>2</sub> (left), CH<sub>4</sub> (right) on UTSA-16-GO28.5 (olive) from two methods: virial equation (solid) and linear extrapolation (open).

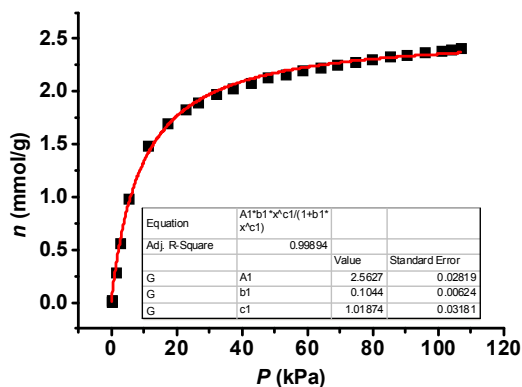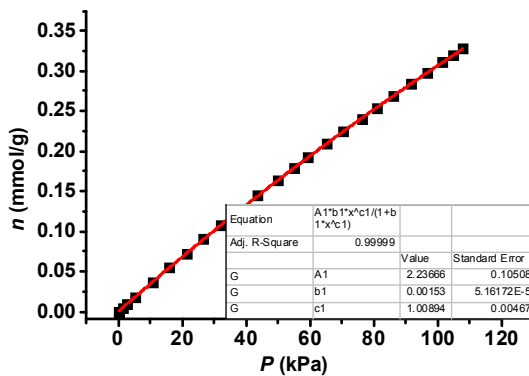

Figure S15 | The graphs of the Single-site Langmuir-Freundlich equations fit for adsorption of CO<sub>2</sub> (left) and CH<sub>4</sub> (right) on UTSA-16-GO9.5 at 296K.

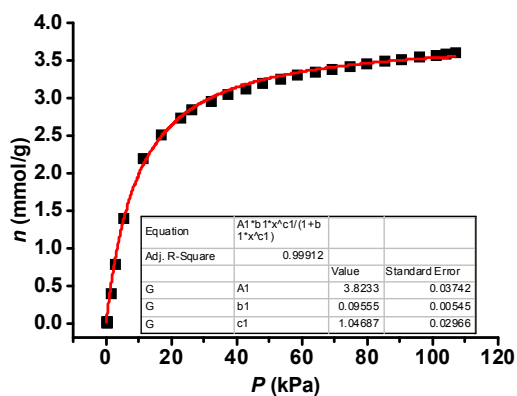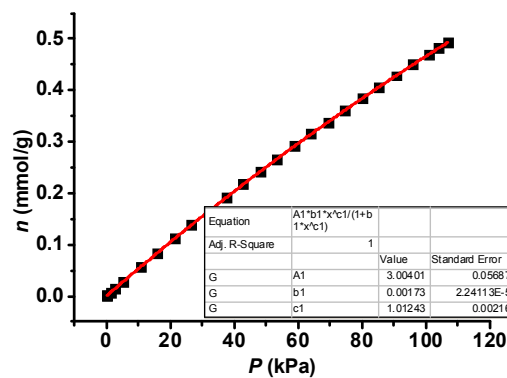

Figure S16 | The graphs of the Single-site Langmuir-Freundlich equations fit for adsorption of CO<sub>2</sub> (left) and CH<sub>4</sub> (right) on UTSA-16-GO19 at 296K.

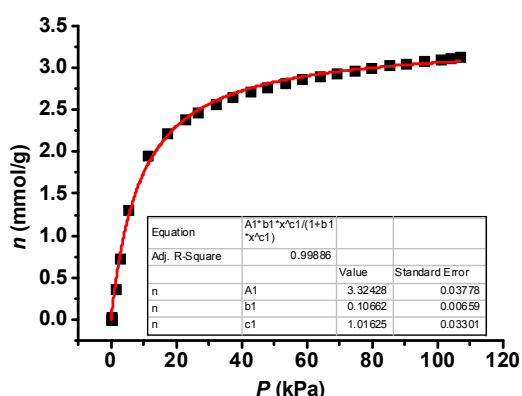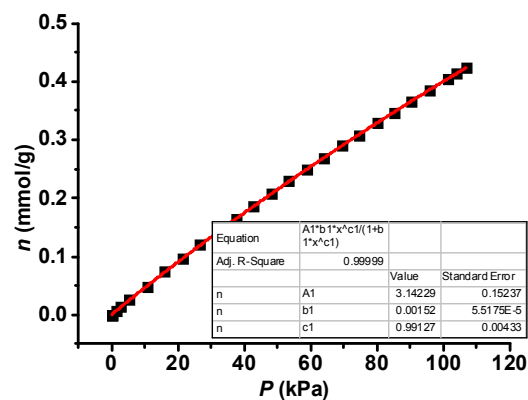

Figure S17 | The graphs of the Single-site Langmuir-Freundlich equations fit for adsorption of CO<sub>2</sub> (left) and CH<sub>4</sub> (right) on UTSA-16-GO28.5 at 296K.

## Supplementary References

- (1) Q. Yan, Y. Lin, C. Kong and L. Chen, *Chem. Commun.*, 2013, **49**, 6 873.
- (2) S. -C. Xiang, Y. -B. He, Z. -J. Zhang, H. Wu, W. Zhou, R. Krishna and B. -L. Chen, *Nature Commun.*, 2012, **3**, 954.
- (3) L. Hou, W. -J. Shi, Y. -Y. Wang, Y. Guo, C. Jin and Q. -Z. Shi, *Chem. Commun.*, 2011, **47**, 5464.
- (4) W. Lou, J. Yang, L. Li and J. Li. *J. Solid State Chem.*, 2014, **213**, 224.
- (5) Q. Yang, A. D. Wiersum, P. L. Llewellyn, V. Guillermin, C. Serre and G. Maurin, *Chem. Commun.*, 2011, **47**, 9603.
- (6) D. Saha, Z. Bao, F. Jia and S. Deng, *Environ. Sci. Technol.*, 2010, **44**, 1820.
- (7) E. Atci, I. Erucar and S. Keskin, *J. Phys. Chem. C*, 2011, **115**, 6833.
- (8) S. D. Burd, S. Ma, J. A. Perman, B. J. Sikora, R. Q. Snurr, P. K. Thallapally, J. Tian, L. Wojtas and M. J. Zaworotko, *J. Am. Chem. Soc.*, 2012, **134**, 3663.
- (9) P. Chowdhury, S. Mekala, F. Dreisbach and S. Gumma, *Microporous Mesoporous Mater.*, 2012, **152**, 246.
- (10) H. Alawisi, B. Li, Y. He, H. D. Arman, A. M. Asiri, H. Wang and B. Chen, *Cryst. Growth Des.*, 2014, **14**, 2522.
- (11) V. Finsy, L. Ma, L. Alaerts, D. E. D. Vos, G. V. Baron and J. F. M. Denayer, *Microporous Mesoporous Mater.*, 2009, **120**, 221.
